# Supplementary material for: Ultrathin single-crystal PtSe2 nanosheets for high-efficiency O2 electroreduction to H2O2
Source: Royal Society of Chemistry journal article supplement (doi:10.1039/d2cc04503f), 2022-01-01
Supplement: d2cc04503f1.pdf [file d2cc04503f1.pdf]

## Electronic Supplementary Information

### Experimental Section

**Materials:** Commercial carbon-supported Pt nanoparticles (JM Pt/C, 20 wt.%) were bought from Johnson Matthey. Perchloric acid ( $\text{HClO}_4$ , 72%), potassium phosphate monobasic ( $\text{KH}_2\text{PO}_4$ , 99.99%), potassium phosphate dibasic ( $\text{K}_2\text{HPO}_4$ , 99.99%) were purchased from Beijing Chemical Corporation. Cerium (IV) sulfate ( $\text{Ce}(\text{SO}_4)_2$ , 99.9%), isopropyl alcohol (IPA, 99.5%), selenium (Se, 99.99%) powder were purchased from Aladdin Ltd. Nafion solution (5% w/w) was obtained from Sigma-Aldrich Chemical Reagent Co. Ltd. High purity Ar (99.999%),  $\text{O}_2$  (99.999%) and  $\text{H}_2/\text{Ar}$  (5%) gas were purchased from Air Liquide Chengdu Co., Ltd. Ultrapure water (18.25  $\Omega$ ) used throughout all experiments was purified through a Millipore system. All the chemicals were used as received without further purification.

**Preparation of  $\text{PtSe}_2/\text{C}$ :** In a typical synthesis, 20 mg Pt/C nanoparticles were placed in the downstream of a quartz tube with an alumina boat containing 1 g Se powder in the upstream side. The quartz tube was heated at 400 °C with a ramp rate of 5 °C  $\text{min}^{-1}$  and kept at 400 °C for 2 h in flowing  $\text{H}_2/\text{Ar}$  (5%) gas to transport the vaporized Se to the Pt nanoparticles. During the heating process, Se powder was vaporized to react with Pt nanoparticles for selenization. Finally, the quartz tube was naturally cooled down to room temperature.

### Characterization:

XRD patterns were acquired on a Shimadzu XRD-6100 diffractometer with Cu  $\text{K}\alpha$  radiation (40 kV, 30 mA) of wavelength 0.154 nm (Japan). SEM images were collected on a GeminiSEM 300 scanning electron microscope (ZEISS, Germany) at an accelerating voltage of 5 kV. XPS measurements were performed on an ESCALABMK II X-ray photoelectron spectrometer using Mg as the exciting source. Raman spectroscopy measurements were performed on a Renishaw 1000 Raman imaging microscope system with an excitation wavelength of 632.8 nm. TEM and HTEM images were collected on a FEI Tecnai G2 F20 SWIN transmission electron microscope operated at 200 kV. In situ attenuated total reflection infrared spectroscopy

measurements were taken on a BRUKER-EQUINOX-55 IR spectrophotometer, a diamond-like carbon was coated onto a Si wafer ( $5 \times 8 \times 1 \text{ mm}^3$ ) to prepare the internal reflection element (IRE). The absorbance data of spectrophotometer were acquired on SHIMADZU UV-1800 UV-Vis spectrophotometer. In situ ATR-FTIR measurements were taken on a BRUKER-EQUINOX-55 IR spectrophotometer, a diamond-like carbon was coated onto a Si wafer ( $5 \times 8 \times 1 \text{ mm}^3$ ) to prepare the internal reflection element (IRE). The coated IRE was ultrasonicated for 2 min with 30% concentrated  $\text{H}_2\text{SO}_4$  followed by rinsing with DI water before experiments. A  $50 \mu\text{L}$  of  $2 \text{ mg mL}^{-1}$  catalyst ink (no Nafion binder) was dropcast on the IRE and dried under air at room temperature. A glassy carbon paper was placed on top of the catalyst layer for good electrical contact. Glassy carbon rod connected to the IRE, Pt gauze, and Ag/AgCl in 3M KCl were used as the working electrode, counter electrode, and reference electrode, respectively. An FTIR spectrometer with a mercury cadmium telluride (MCT) detector was used for the in situ ATR-FTIR measurements. 0.1 M PBS solutions were saturated with  $\text{O}_2$  for ORR. Gamry Reference 600 potentiostat during recording of the IR spectra.

#### **Electrochemical measurements:**

All the electrochemical experiments were performed on an electrochemical workstation (CHI 760E) in a three-electrode system. For the rotating ring-disk electrode (RRDE) measurements, a glassy carbon electrode with a diameter of 5.6 mm, Ag/AgCl and a platinum plate electrode ( $1 \times 1 \text{ cm}^2$ ) were employed as working electrode, reference electrode, and counter electrode, respectively. The potentials reported in this experiment were converted to reversible hydrogen electrode (RHE) scale via normalization processing with the following equation:  $E (\text{vs. RHE}) = E (\text{vs. Ag/AgCl}) + 0.059 \times \text{pH} + 0.198 \text{ V}$ . The RRDE was polished with different particle size of alumina powder ( $1 \mu\text{m}$  and  $0.05 \mu\text{m}$ ) for 5 min and ultra-sonicated in ultrapure water for 10 s. The ink was prepared by mixing the catalysts in ultrapure water, isopropyl alcohol (v/v = 4/1) to achieve a catalyst concentration of  $5 \text{ mg mL}^{-1}$  with  $20 \mu\text{L}$  Nafion solution via sonication for 30 min. Working electrode was obtained through spin-coating (400 rpm)  $5 \mu\text{L}$  of the catalytic ink onto the glassy carbon electrode after natural drying. The  $\text{H}_2\text{O}_2$  production activity was assessed by LSV with a scan rate of  $10 \text{ mV s}^{-1}$  under a rotation

speed of 1600 rpm in O<sub>2</sub>-saturated 0.1 M PBS and 0.1 M HClO<sub>4</sub> electrolytes. During the LSV, the Pt ring potential was fixed at 1.2 V vs. RHE. The H<sub>2</sub>O<sub>2</sub> selectivity was calculated using the following relation:

$$\text{H}_2\text{O}_2 (\%) = 200 \times (I_{\text{ring}} / N) / (I_{\text{disk}} + I_{\text{ring}} / N)$$

where  $I_{\text{ring}}$  is the ring current,  $I_{\text{disk}}$  is the disk current and N is the collection efficiency (0.35 after calibration).

The electron transferred number of per oxygen molecule in the ORR can be calculated by the Koutechy-Levich (K-L) equation (1).

$$1/J = 1/J_k + B^{-1}\omega^{-1/2} \quad (1)$$

Where  $J_k$  is the kinetic current density and  $\omega$  is the rotation rate. The value of B could be calculated from the slope of Levich equation (2) as follows:

$$B = 0.2nF(D_0)^{2/3}\nu^{-1/6}C_0 \quad (2)$$

Where n is the electron transfer number of per oxygen molecule, F is the Faraday constant ( $F = 96485 \text{ C mol}^{-1}$ ),  $C_0$  is the bulk concentration of O<sub>2</sub> ( $1.2 \times 10^{-1} \text{ mol cm}^3$ ),  $D_0$  is the diffusion coefficient of O<sub>2</sub> ( $1.67 \times 10^{-5} \text{ cm}^2 \text{ s}^{-1}$ ),  $\nu$  is the kinetic viscosity ( $0.01 \text{ cm}^2 \text{ s}^{-1}$ ), the constant is 0.2 when the rotation speed unit is represented as rpm.<sup>1</sup>

**The electrogeneration of H<sub>2</sub>O<sub>2</sub>:** The electro-generation of H<sub>2</sub>O<sub>2</sub> was evaluated in a two-compartment cell with nafion membrane as separator. First, the membrane was protonated by in 5 wt % H<sub>2</sub>O<sub>2</sub> aqueous solution at 80 °C for 1 h, then washed with ultrapure water until the pH value of the water returned to neutral, followed by boiling with dilute H<sub>2</sub>SO<sub>4</sub> (5 wt%) at 80 °C for 1 h. Finally, the membrane was soaked with ultrapure water for 4 h. The electrochemical experiments were carried out with an electrochemical workstation (CHI 760E) using a three-electrode system. Cathode were prepared by depositing PtSe<sub>2</sub>/C ink on a carbon paper (PtSe<sub>2</sub>/C-CP, 0.1 mg cm<sup>-2</sup>).

To quantify the H<sub>2</sub>O<sub>2</sub> produced, the samples were collected at certain time and mixed with same volume of Ce(SO<sub>4</sub>)<sub>2</sub> solution (0.1 mmol L<sup>-1</sup>). The H<sub>2</sub>O<sub>2</sub> yield was measured by using the indicator of Ce(SO<sub>4</sub>)<sub>2</sub> ( $2\text{Ce}^{4+} + \text{H}_2\text{O}_2 \rightarrow 2\text{Ce}^{3+} + 2\text{H}^+ + \text{O}_2$ ). The generated complex compound solution was detected with UV-vis spectrophotometer. A typical concentration-absorbance curve was calibrated by linear fitting the absorbance values at wavelength length of 320 nm for various known concentration of

0.02, 0.04, 0.06, 0.08, 0.1 mmol L<sup>-1</sup> of Ce<sup>4+</sup>. The fitting curve ( $y = 5.025x - 0031$ ,  $R^2 = 0.99997$ ) shows good linear relation of absorbance value with H<sub>2</sub>O<sub>2</sub> concentration. The yield of H<sub>2</sub>O<sub>2</sub> was finally determined based on the reduced Ce<sup>4+</sup> concentration. The Faradic efficiency (FE) for H<sub>2</sub>O<sub>2</sub> generation in H-cell was calculated as follows:

$$\text{FE}\% = \frac{\text{mole of generation H}_2\text{O}_2 \times 2 \times 96485}{\text{total consumed charge (C)}}$$

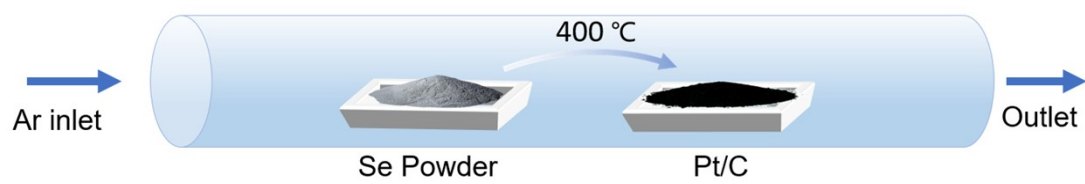

**Fig. S1.** Schematic of the experimental setup for the selenization of Pt/C to PtSe<sub>2</sub>/C.

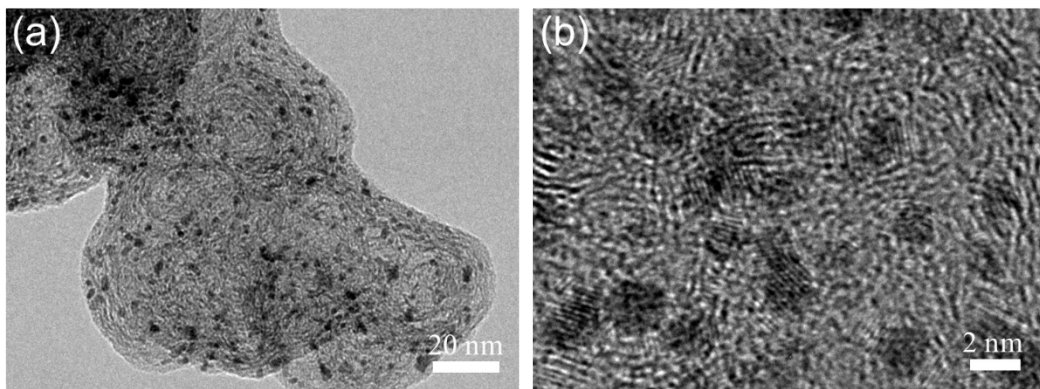

**Fig. S2.** (a) TEM and (b) high resolution TEM images of commercial Pt/C.

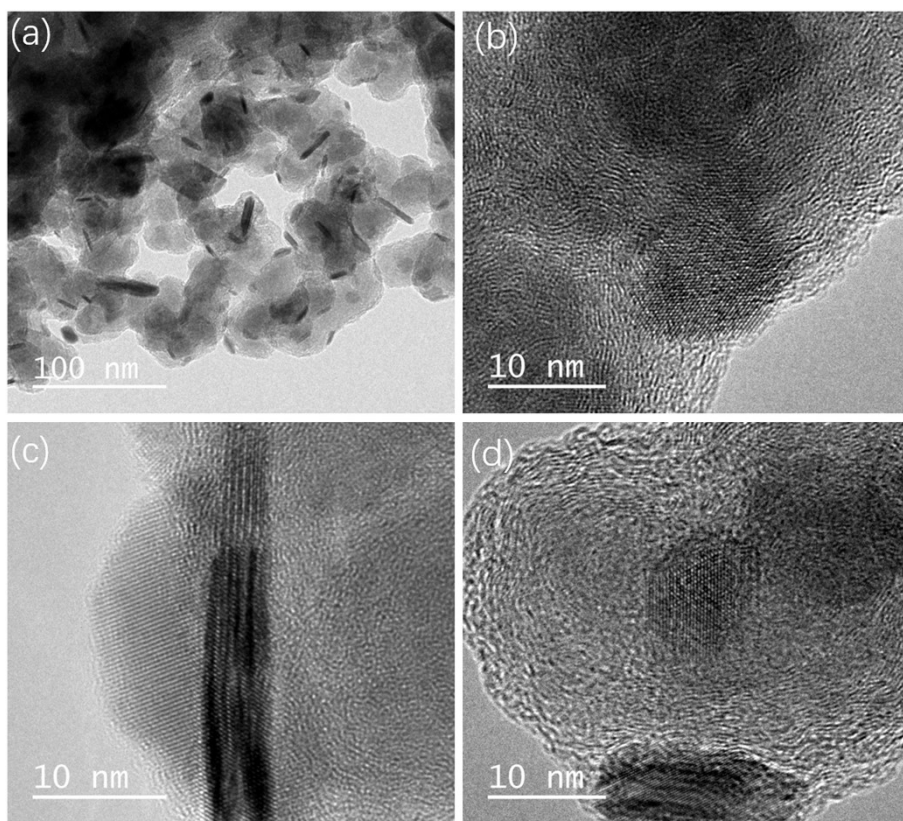

**Fig. S3.** (a) TEM and (b-d) high resolution TEM images of PtSe<sub>2</sub>/C.

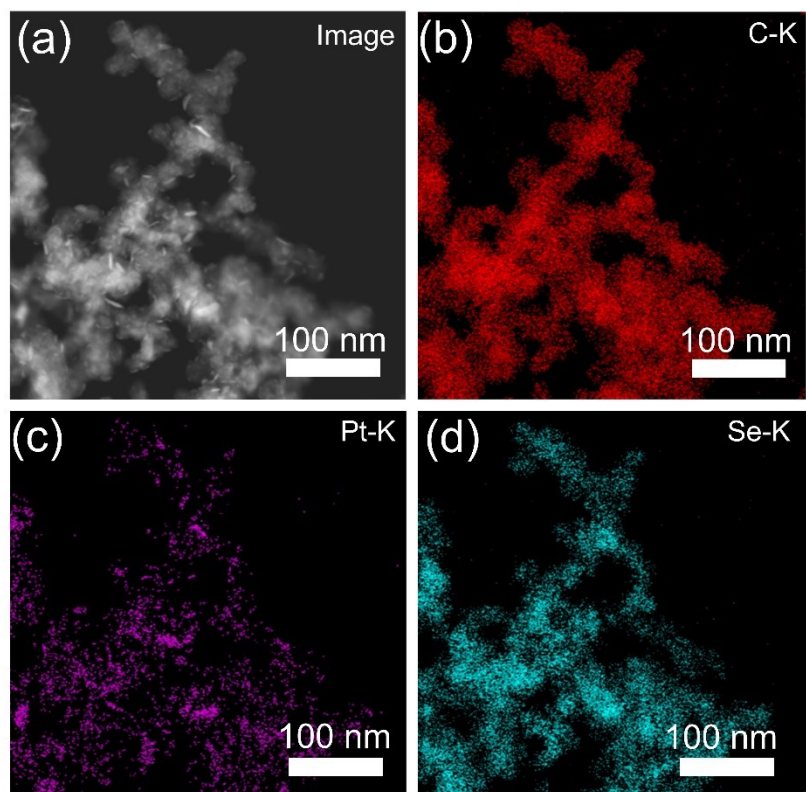

**Fig. S4.** STEM image (a) and the corresponding EDX elemental mapping images of (b) C, (c) Pt and (d) Se.



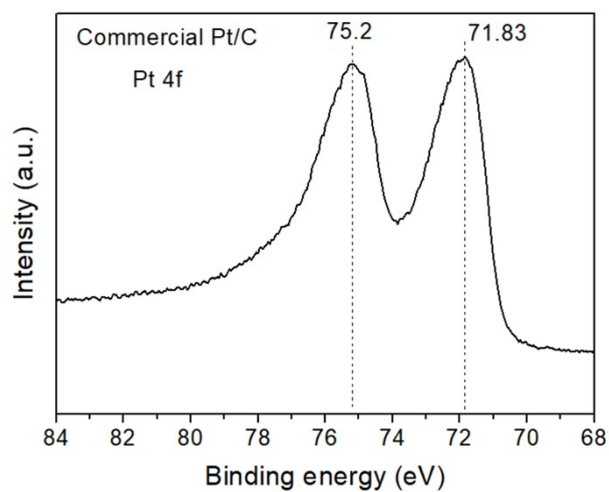

**Fig. S5.** XPS spectra of commercial Pt/C in the Pt 4f region.

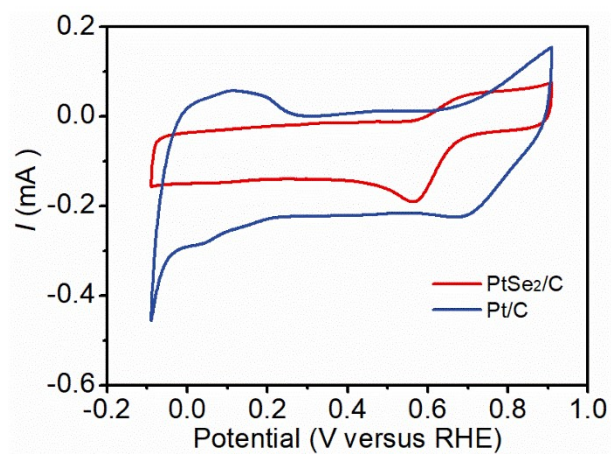

**Fig. S6.** CV curves of Pt/C and PtSe<sub>2</sub>/C in O<sub>2</sub>-saturated 0.1 M PBS.

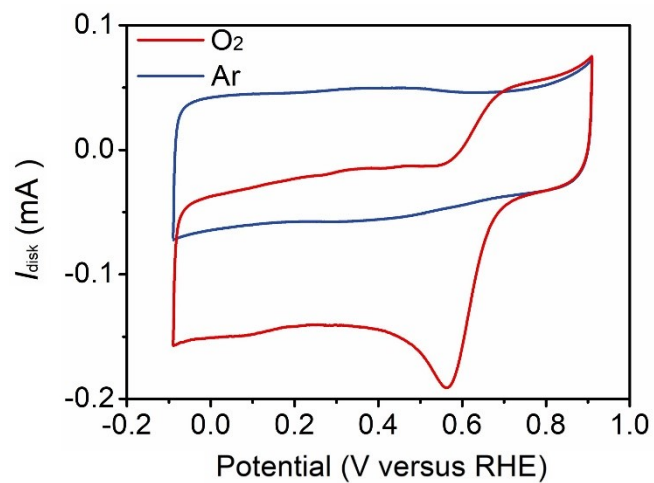

**Fig. S7.** CV curves of PtSe<sub>2</sub>/C in Ar and O<sub>2</sub>-saturated 0.1 M PBS.

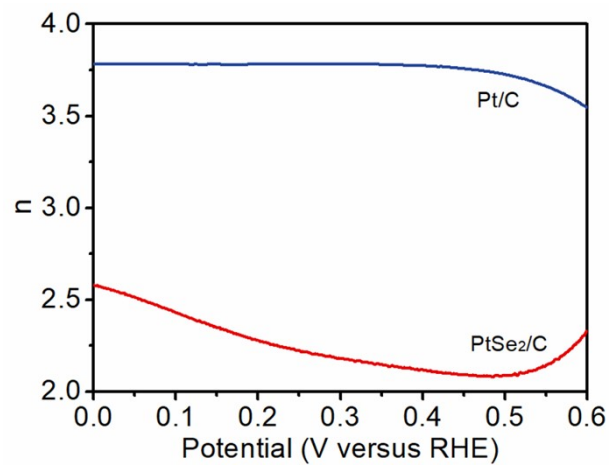

**Fig. S8.** Calculated electron transfer numbers of Pt/C and PtSe<sub>2</sub>/C in 0.1 M PBS electrolyte.

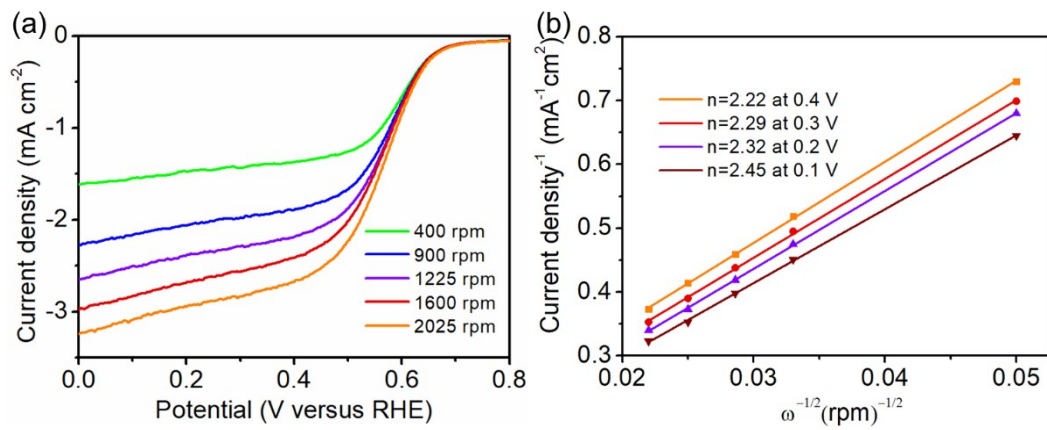

**Fig. S9.** (a) LSV curves of PtSe<sub>2</sub>/C at different rotation rates and (b) corresponding Koutecky-Levich plots.

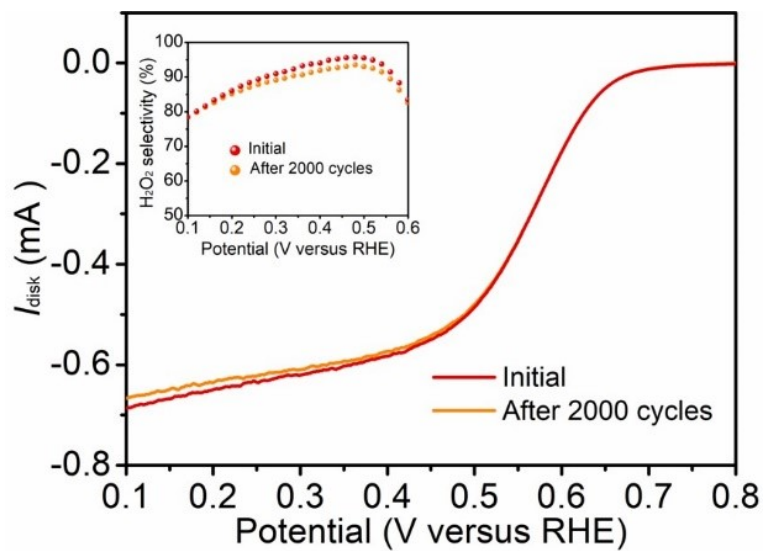

**Fig. S10.** Stability measurements of  $\text{PtSe}_2/\text{C}$  in PBS, the inset represents the selectivity of  $\text{PtSe}_2$  before and after 2000 CV cycles.

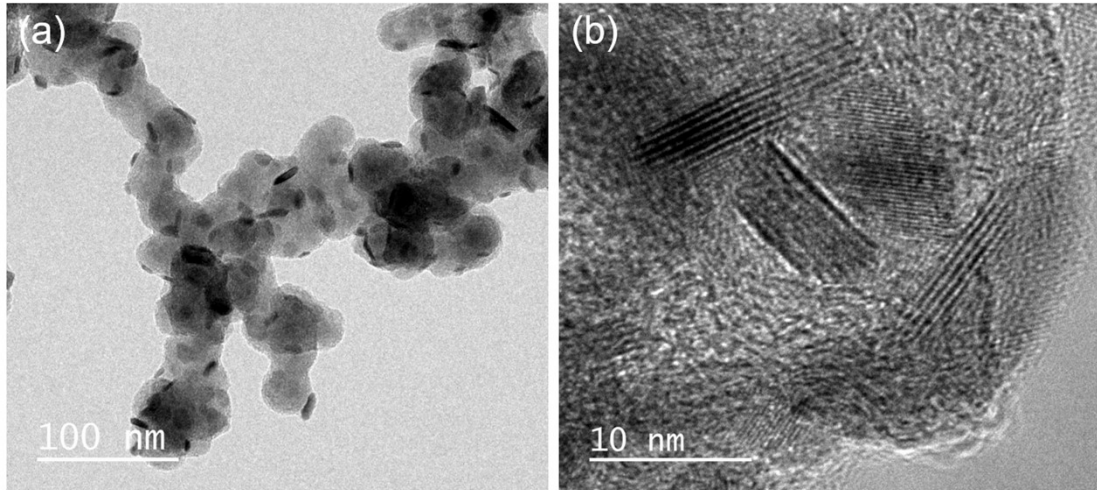

**Fig. S11.** (a) TEM and (b) high resolution TEM images of PtSe<sub>2</sub>/C after 2000 cycles.

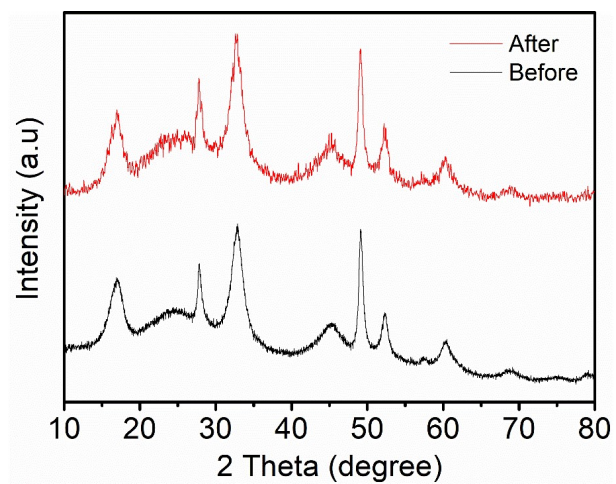

**Fig. S12.** XRD pattern of PtSe<sub>2</sub>/C before and after 2000 cycles.



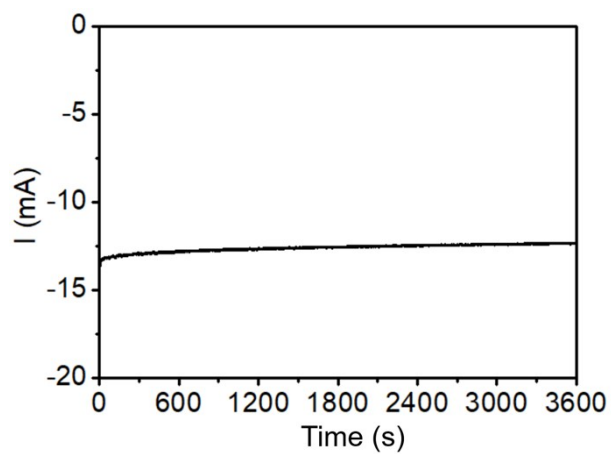

**Fig. S13.** Time-dependent current curve of PtSe<sub>2</sub>/C in O<sub>2</sub>-saturated 0.1 M PBS at 0.3 V.

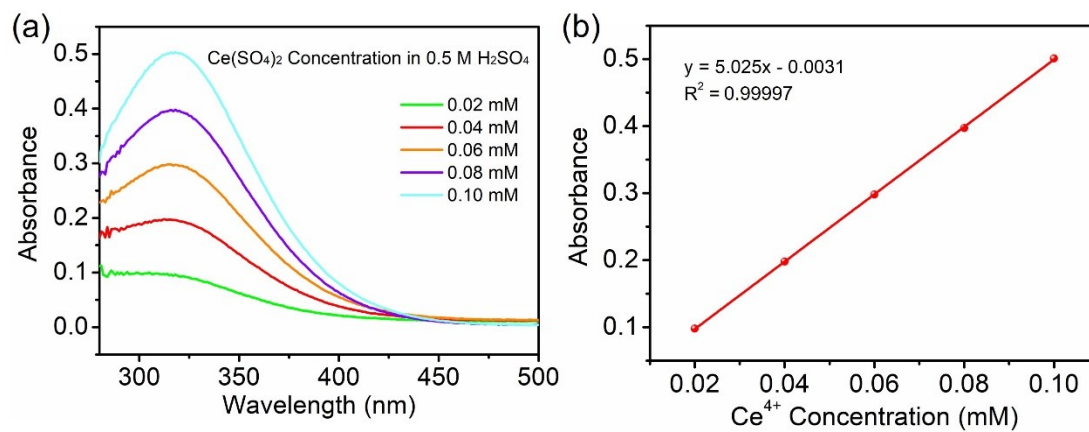

**Fig. S14.** (a) UV-Vis spectra of  $\text{Ce}^{4+}$  solution with various concentrations. (b) corresponding standard curve.

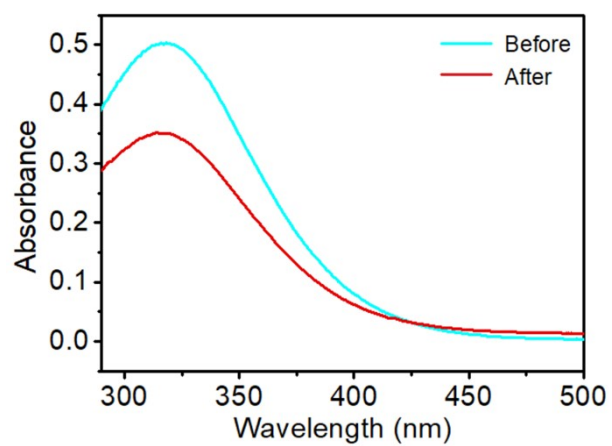

**Fig. S15.** UV-Vis spectra of the ceric sulfate indicator before and after stained with electrolytes.

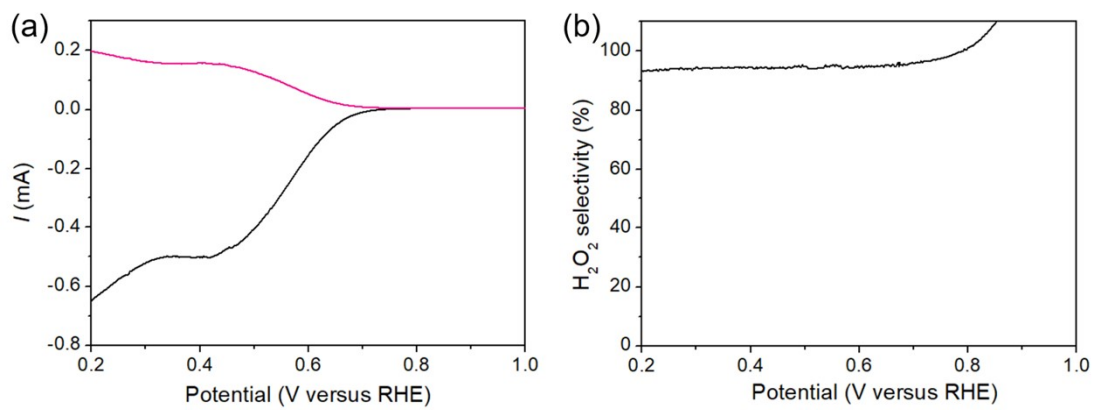

**Fig. S16.** (a) Polarization curves of PtSe<sub>2</sub>/C and Pt/C at 1600 rpm in O<sub>2</sub>-saturated 0.1 M KOH and (b) corresponding H<sub>2</sub>O<sub>2</sub> selectivity.

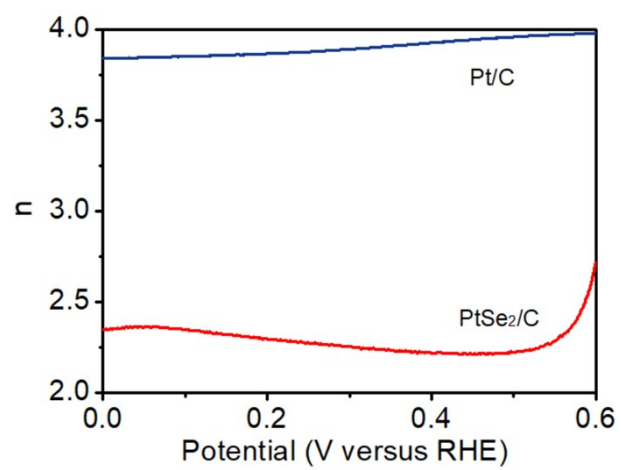

**Fig. S17.** Calculated electron transfer numbers of Pt/C and PtSe<sub>2</sub>/C in 0.1 M HClO<sub>4</sub> electrolyte.

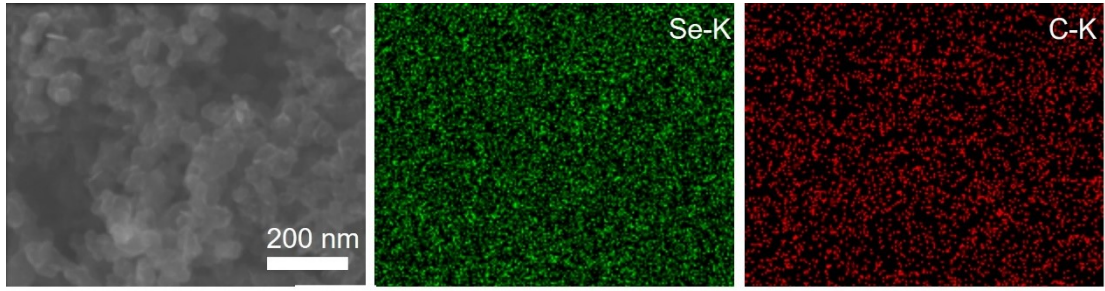

**Fig. S18.** The EDX elemental mapping images of Se/C.

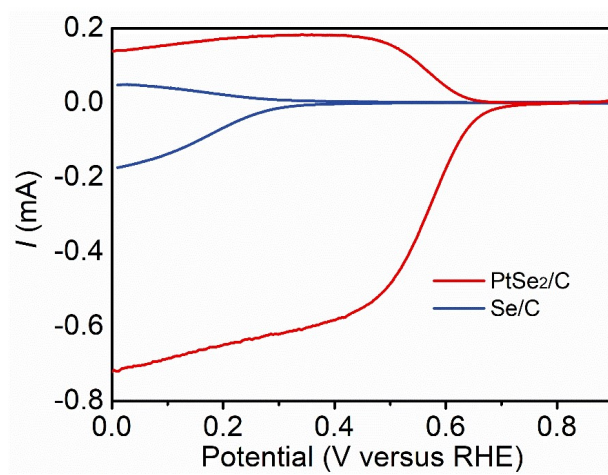

**Fig. S19.** LSV curves of PtSe<sub>2</sub>/C and Se/C in O<sub>2</sub>-saturated 0.1 M PBS.

**Table S1.** Comparison of the catalytic performance of PtSe<sub>2</sub>/C with reported 2e<sup>-</sup> ORR catalysts.

| Electrocatalyst                             | Electrolyte                          | Selectivity [%] | Over potential V vs. RHE | Reference |
|---------------------------------------------|--------------------------------------|-----------------|--------------------------|-----------|
| PtSe <sub>2</sub> /C                        | 0.1 M PBS                            | 94.1            | 0                        | This work |
|                                             | 0.1 M HClO <sub>4</sub>              | 85.1            | 0.1                      |           |
| Au-Pd/C                                     | 0.1 M HClO <sub>4</sub>              | 93              | 0.35                     | 2         |
| Pt-Hg/C                                     | 0.1 M HClO <sub>4</sub>              | 91              | 0.1                      | 3         |
| Pt1/TiN                                     | 0.1 M HClO <sub>4</sub>              | 60              | 0.2                      | 4         |
| Fe-C-O                                      | 0.1 M PBS                            | 80              | 0.2                      | 5         |
| Co1-NG(O)                                   | 0.1 M PBS                            | 50              | 0                        | 6         |
|                                             | 0.1 M HClO <sub>4</sub>              | 55              | 0                        |           |
| VC                                          | 0.1 M H <sub>2</sub> SO <sub>4</sub> | 75              | 0.4                      | 7         |
| Co-NC                                       | 0.1 M HClO <sub>4</sub>              | 93              | 0                        | 8         |
| Pt/HSC                                      | 0.1 M HClO <sub>4</sub>              | 94              | 0.1                      | 9         |
| Pt/TiC                                      | 0.1 M HClO <sub>4</sub>              | 68              | 0.25                     | 10        |
| C(Pt)/C                                     | 1 M HClO <sub>4</sub>                | 41              | 0.1                      | 11        |
| Au/C                                        | 0.1 M HClO <sub>4</sub>              | 80              | /                        | 12        |
| MoTe <sub>2</sub> /Graphene                 | 0.5 M H <sub>2</sub> SO <sub>4</sub> | 90              | 0.14                     | 13        |
| monodisperse colloidal PtP <sub>2</sub> NCs | 0.1 M HClO <sub>4</sub>              | 90              | 0.05                     | 14        |
| Pd <sub>4</sub> Se                          | 0.1 M KCl                            | 89.7            | 0                        | 15        |



1. C Song, J Zhang. Springer, London, 2008: 89-134. C. Song and J. Zhang, in PEM Fuel Cell Electrocatalysts and Catalysts Layers: Fundamentals and Applications, ed. J. Zhang, Springer, 2008, vol. XXII.
2. J. S. Jirkovský, I. Panas, E. Ahlberg, M. Halasa, S. Romani and D. J. Schiffrin, *J. Am. Chem. Soc.*, 2011, **133**, 19432–19441.
3. S. Siahrostami, A. Verdaguer-Casadevall, M. Karamad, D. Deiana, P. Malacrida, B. Wickman, M. Escudero-Escribano, E. A. Paoli, R. Frydendal, T. W. Hansen, I. Chorkendorff, I. E. L. Stephens and J. Rossmeisl, *Nat. Mater.*, 2013, **12**, 1137–1143.
4. S. Yang, J. Kim, Y. J. Tak, A. Soon and H. Lee, *Angew. Chem. Int. Ed.*, 2016, **55**, 2058–2062.
5. K. Jiang, S. Back, A. J. Akey, C. Xia, Y. Hu, W. Liang, D. Schaak, E. Stavitski, J. K. Nørskov, S. Siahrostami and H. Wang, *Nat. Commun.*, 2019, **10**, 3397.
6. E. Jung, H. Shin, B. H. Lee, V. Efremov, S. Lee, H. S. Lee, J. Kim, W. Hooch Antink, S. Park, K. S. Lee, S. P. Cho, J. S. Yoo, Y. E. Sung and T. Hyeon, *Nat. Mater.*, 2020, **19**, 436–442.
7. A. Wang, A. Bonakdarpour, D. P. Wilkinson and E. Gyenge, *Electrochim. Acta*, 2012, **66**, 222–229.
8. J. Gao, H. bin Yang, X. Huang, S. F. Hung, W. Cai, C. Jia, S. Miao, H. M. Chen, X. Yang, Y. Huang, T. Zhang and B. Liu, *Chem*, 2020, **6**, 658–674.
9. C. H. Choi, M. Kim, H. C. Kwon, S. J. Cho, S. Yun, H. T. Kim, K. J. Mayrhofer, H. Kim and M. Choi, *Nat. Commun.*, 2016, **7**, 10922.
10. S. Yang, Y. J. Tak, J. Kim, A. Soon and H. Lee, *ACS Catal.*, 2017, **7**, 1301–1307.
11. C. H. Choi, H. C. Kwon, S. Yook, H. Shin, H. Kim, M. Choi, *J. Phys. Chem. C*, 2014, **118**, 30063–30070.
12. J. S. Jirkovsky, M. Halasa, D. J. Schiffrin, *Phys. Chem. Chem. Phys.*, 2010, **12**, 8042–8052.
13. X. Zhao, Y. Wang, Y. Da, X. Wang, T. Wang, M. Xu, X. He, W. Zhou, Y. Li, J. N. Coleman, Y. Li, *Natl. Sci. Rev.*, 2020, **7**, 1360–1366.
14. H. Li, P. Wen, D. S. Itanze, Z. D. Hood, S. Adhikari, C. Lu, X. Ma, C. Dun, L.

- Jiang, D. L. Carroll, Y. Qiu, S. M. Geyer, *Nat. Commun.*, 2020, **11**, 3928.
15. C. Yang, S. Bai, Z. Yu, Y. Feng, B. Huang, Q. Lu, T. Wu, M. Sun, T. Zhu, C. Cheng, L. Zhang, Q. Shao, X. Huang, *Nano Energy*, 2021, **89**, 106480.
